# Supplementary material for: Altitudinal gradients, biogeographic history and microhabitat adaptation affect fine-scale spatial genetic structure in African and Neotropical populations of an ancient tropical tree species
Source: PLoS One. 2017 Aug 3;12(8):e0182515. doi: 10.1371/journal.pone.0182515 (PMC5542443; doi:10.1371/journal.pone.0182515)
Supplement: S1 File — (XLSX) [file pone.0182515.s001.xlsx]

## Sheet: README
S1 File. Geographic coordinates and microsatellite genotypes of Symphonia globulifera samples used in this study.
This file contains individual IDs, population IDs, geographic coordinates (UTM), altitude (m above sea leve), altitude class used in analyses, and SSR allele sizes coded in two columns (one for each observed allele).
Each tab corresponds to a different population.
The data from Paracou are taken from Degen et al 2004, Heredity 93: 585–591. They contained three loci (Sg03, Sg18 and SgC4) genotyped on an ABI 310 genetic analyzer (Applied Biosystems, Carlsbad, USA).
The data of Yasuni and BCI contained five SSRs (Sg03, Sg18, SgC4, Sg19 and Sg06) and were genotyped on an ABI 3700 Genetic Analyzer (Applied Biosystems). They are cross-standardized for allele identities.
The data of Ituberá, Mbikiliki, Nkong Mekak and Sao Tomé contained five loci (Sg03 – PET, Sg18 – FAM, SgC4 – FAM, Sg19 – VIC, Sg10 – PET [locus – fluorescent label]) and were separated on an ABI 3730 Genetic Analyzer (Applied Biosystems). They are cross-standardized for allele identities.
In Sao Tomé, individual FO0001 did not have original coordinates available. We placed it next to FO004 for SGS analysis, as both were probably sampled close-by (nearly sequential naming).
Original references of loci used in this study
Locus	Reference	Comment
Sg03	Degen et al., 2004, Heredity 93: 585–591.
Sg06	Vinson et al., 2005, Mol Ecol Notes 5: 202–204.
Sg10	Vinson et al., 2005, Mol Ecol Notes 5: 202–204.
Sg18	Degen et al., 2004, Heredity 93: 585–591.
Sg19	Aldrich et al., 1998, Mol Ecol 7: 933–944.
SgC4	Aldrich et al., 1998, Mol Ecol 7: 933–944.
Sg92	Dick & Heuertz, 2008, Evolution 62: 2760–2774	same locus as Sg18
	Degen B, Bandou E, Caron H. Limited pollen dispersal and biparental inbreeding in Symphonia globulifera in French Guiana. Heredity. 2004;93: 585–591. doi:10.1038/sj.hdy.6800560
	Vinson CC, Amaral AC, Sampaio I, Ciampi AY. Characterization and isolation of DNA microsatellite primers for the tropical tree, Symphonia globulifera Linn. f. Mol Ecol Notes. 2005; 5: 202–204. doi:10.1111/j.1471-8286.2005.00876.x
	Aldrich PR, Hamrick JL, Chavarriaga P, Kochert G. Microsatellite analysis of demographic genetic structure in fragmented populations of the tropical tree Symphonia globulifera. Mol Ecol. 1998;7: 933–944. doi:10.1046/j.1365-294x.1998.00396.x
	Dick CW, Heuertz M. The complex biogeographic history of a widespread tropical tree species. Evolution. 2008;62: 2760–2774. doi:10.1111/j.1558-5646.2008.00506.x

## Sheet: Paracou
Individuals, population, UTM coordinates and SSR genotypes							UTM zone: 22N
Individuals	Morphotype	Population	x	y	Altitude (m)	Altitude class	Sg03		Sg18		SgC4
1020392	globulifera	Paracou	285164	582821	45	H1	318	332	303	303	163	167
1030451	sp.1	Paracou	285085	582708	42	H1	306	324	303	313	157	167
1040376	sp.1	Paracou	285193	582701	46	H1	328	330	299	303	169	199
2010538	Indet.	Paracou	285017	582422	38	H1	316	320	303	307	165	191
2010755	Indet.	Paracou	285042	582453	38	H1	324	332	303	305	167	187
2020052	Indet.	Paracou	285060	582514	39	H1	324	328	299	317	187	187
2020897	Indet.	Paracou	285164	582568	43	H1	320	330	303	307	173	207
2030461	Indet.	Paracou	285038	582366	38	H1	324	332	303	309	183	187
3010574	sp.1	Paracou	285305	582536	38	H1	330	348	303	307	157	207
3020318	Indet.	Paracou	285409	582501	41	H1	328	328	313	323	173	177
3040312	sp.1	Paracou	285448	582394	41	H1	332	340	303	317	153	155
3040337	sp.1	Paracou	285458	582363	42	H1	328	340	303	307	167	197
11010312	sp.1	Paracou	286055	581157	63	H3	320	322	305	315	167	187
11010744	sp.1	Paracou	286115	581108	62	H3	324	346	297	309	153	155
11041070	globulifera	Paracou	286275	581129	51	H2	320	324	299	301	173	181
12020418	sp.1	Paracou	286482	581234	46	H1	324	332	303	311	151	189
12030509	sp.1	Paracou	286401	581147	57	H3	328	328	297	307	151	167
16010039	sp.1	Paracou	285216	581358	49	H2	318	328	307	307	147	171
16010048	Indet.	Paracou	285211	581368	49	H2	320	320	303	305	163	171
16010066	Indet.	Paracou	285216	581388	49	H2	304	322	307	307	149	167
16010293	globulifera	Paracou	285251	581381	47	H1	306	322	305	323	137	155
16010531	sp.1	Paracou	285302	581405	44	H1	324	324	305	323	155	155
16020038	sp.1	Paracou	285321	581392	47	H1	328	328	299	305	173	177
16020162	sp.1	Paracou	285332	581414	47	H1	328	328	303	305	155	155
16020271	Indet.	Paracou	285361	581382	54	H3	322	328	305	305	177	197
16020285	Indet.	Paracou	285352	581396	53	H3	332	338	305	307	189	197
16030109	sp.1	Paracou	285405	581481	52	H2	322	338	305	305	167	167
16030332	sp.1	Paracou	285456	581502	51	H2	302	320	305	307	165	187
16030364	sp.1	Paracou	285466	581464	53	H3	0	0	297	315	175	175
16040005	Indet.	Paracou	285520	581422	54	H3	320	330	303	303	155	197
16040208	Indet.	Paracou	285533	581422	54	H3	334	338	307	325	153	155
16040266	sp.1	Paracou	285545	581464	55	H3	320	324	315	325	153	153
16040274	sp.1	Paracou	285546	581487	53	H3	324	332	305	325	167	175
16040308	sp.1	Paracou	285532	581504	53	H3	330	334	307	315	171	175
16040390	Indet.	Paracou	285548	581503	53	H3	324	332	0	0	183	197
16040500	sp.1	Paracou	285592	581486	52	H2	304	306	305	307	165	173
16050049	sp.1	Paracou	285593	581497	52	H2	320	328	305	305	153	197
16050090	sp.1	Paracou	285582	581528	51	H2	320	320	307	325	163	175
16050112	sp.1	Paracou	285621	581529	48	H1	320	328	305	305	155	197
16050369	sp.1	Paracou	285653	581496	48	H1	322	322	303	303	151	195
16060273	sp.1	Paracou	285286	581303	40	H1	320	328	303	305	167	197
16060366	sp.1	Paracou	285303	581298	40	H1	306	330	305	307	167	175
16070055	sp.1	Paracou	285332	581316	43	H1	330	332	305	307	151	157
16070069	sp.1	Paracou	285329	581336	46	H1	318	324	307	325	189	197
16070116	sp.1	Paracou	285363	581335	51	H2	322	328	303	303	165	175
16070509	sp.1	Paracou	285418	581358	54	H3	336	338	303	303	167	167
16070537	sp.1	Paracou	285399	581375	54	H3	336	336	305	309	173	177
16080433	sp.1	Paracou	285531	581328	55	H3	324	324	303	307	151	167
16080479	sp.1	Paracou	285510	581370	54	H3	0	0	305	305	155	167
16080545	sp.1	Paracou	285492	581336	55	H3	314	328	315	323	155	167
16090129	sp.1	Paracou	285544	581421	54	H3	334	334	305	315	151	167
16090130	sp.1	Paracou	285539	581415	54	H3	324	328	305	305	155	165
16090281	sp.1	Paracou	285563	581404	55	H3	322	328	305	307	171	177
16090473	sp.1	Paracou	285597	581407	53	H3	324	332	303	307	157	173
16100125	sp.1	Paracou	285632	581407	51	H2	336	336	297	303	165	167
16100158	sp.1	Paracou	285648	581381	51	H2	324	324	303	303	155	179
16100245	Indet.	Paracou	285659	581398	50	H2	324	324	305	307	167	197
16100286	sp.1	Paracou	285652	581452	49	H2	318	318	303	305	163	173
16100404	sp.1	Paracou	285712	581396	49	H2	322	322	303	305	167	195
16100417	sp.1	Paracou	285714	581409	49	H2	320	324	305	305	155	195
16110032	sp.1	Paracou	285287	581150	43	H1	306	328	305	305	147	167
16110100	sp.1	Paracou	285269	581210	41	H1	320	320	305	305	171	195
16110174	sp.1	Paracou	285289	581198	44	H1	304	334	303	303	167	175
16110177	sp.1	Paracou	285293	581187	44	H1	320	338	307	307	163	169
16110248	Indet.	Paracou	285332	581164	46	H1	322	322	307	315	171	195
16110380	globulifera	Paracou	285343	581228	49	H2	318	320	303	305	161	173
16110445	globulifera	Paracou	285374	581158	49	H2	324	324	303	303	151	167
16110545	globulifera	Paracou	285369	581174	50	H2	318	320	303	303	163	171
16120006	globulifera	Paracou	285372	581178	49	H2	320	320	303	307	163	163
16120007	Indet.	Paracou	285369	581178	50	H2	318	324	303	303	161	173
16120106	sp.1	Paracou	285387	581254	50	H2	306	306	305	307	175	187
16120280	sp.1	Paracou	285402	581240	52	H2	306	328	307	307	175	195
16120361	Indet.	Paracou	285430	581252	52	H2	320	328	303	307	154	171
16130057	sp.1	Paracou	285462	581233	54	H3	304	318	303	303	165	197
16130235	Indet.	Paracou	285522	581207	52	H2	330	332	303	307	167	171
16130513	sp.1	Paracou	285539	581287	57	H3	298	306	297	307	157	167
16130521	sp.1	Paracou	285538	581276	57	H3	302	314	313	323	161	167
16140155	sp.1	Paracou	285588	581289	56	H3	296	322	303	307	151	195
16140198	Indet.	Paracou	285587	581244	55	H3	334	334	303	307	167	171
16160020	sp.1	Paracou	285312	581044	46	H1	328	328	303	307	151	151
16160508	globulifera	Paracou	285384	581066	48	H1	324	328	299	313	167	171
16170210	globulifera	Paracou	285386	581138	47	H1	324	328	303	307	167	171
16170235	Indet.	Paracou	285383	581145	49	H2	328	338	313	313	163	165
16170556	sp.1	Paracou	285486	581115	48	H1	0	0	297	303	169	179
16170622	Indet.	Paracou	285398	581128	47	H1	312	312	313	313	153	165
16180007	sp.1	Paracou	285502	581098	47	H1	322	322	297	299	155	171
16180011	sp.1	Paracou	285509	581092	47	H1	332	332	303	307	165	177
16180079	sp.1	Paracou	285492	581158	49	H2	324	324	307	307	163	171
16180296	Indet.	Paracou	285512	581193	49	H2	328	338	303	303	169	177
16180438	sp.1	Paracou	285564	581161	55	H3	332	336	303	307	163	177
16190151	sp.1	Paracou	285619	581159	49	H2	324	324	303	305	151	161
16190221	Indet.	Paracou	285625	581180	49	H2	332	332	303	307	179	197
16190404	sp.1	Paracou	285683	581147	48	H1	334	334	299	299	183	197
16200026	sp.1	Paracou	285701	581172	48	H1	322	330	307	307	153	173
16200042	sp.1	Paracou	285694	581184	48	H1	338	338	303	307	179	197
16200047	sp.1	Paracou	285685	581178	48	H1	320	320	303	307	155	163
16200061	sp.1	Paracou	285687	581191	48	H1	324	324	307	307	179	197
16200067	sp.1	Paracou	285697	581193	48	H1	308	324	307	307	155	177
16200136	sp.1	Paracou	285675	581244	51	H2	324	324	305	307	135	157
16200218	sp.1	Paracou	285719	581206	49	H2	328	328	307	307	151	167
16200235	sp.1	Paracou	285715	581182	47	H1	322	324	303	315	151	171
16200246	sp.1	Paracou	285710	581173	47	H1	0	0	307	315	171	199
16200310	sp.1	Paracou	285730	581181	47	H1	324	324	303	315	157	165
16200338	sp.1	Paracou	285723	581207	49	H2	320	330	297	303	191	197
16200342	sp.1	Paracou	285729	581207	49	H2	324	324	305	315	151	197
16200367	sp.1	Paracou	285726	581235	51	H2	318	318	303	303	155	167
16200418	sp.1	Paracou	285724	581250	51	H2	320	320	303	303	189	197
16200425	sp.1	Paracou	285733	581244	51	H2	324	324	299	307	155	169
16200469	sp.1	Paracou	285750	581220	51	H2	320	320	307	307	169	177
16200514	sp.1	Paracou	285746	581180	48	H1	322	324	303	324	155	171
16200562	sp.1	Paracou	285780	581191	48	H1	322	322	303	307	155	173
16200605	sp.1	Paracou	285772	581226	51	H2	320	320	303	305	171	197
16200648	sp.1	Paracou	285755	581264	55	H3	0	0	297	307	179	189
16210043	Indet.	Paracou	285332	580954	48	H1	312	326	313	313	155	167
16210046	Indet.	Paracou	285330	580951	48	H1	314	326	311	311	0	0
16210412	Indet.	Paracou	285365	580985	55	H3	304	304	303	311	151	157
16210611	Indet.	Paracou	285393	580988	54	H3	328	338	299	313	157	167
16210686	Indet.	Paracou	285418	580976	54	H3	322	322	297	303	167	195
16220035	Indet.	Paracou	285430	580991	53	H3	304	326	303	303	159	171
16220359	Indet.	Paracou	285493	581042	51	H2	324	328	297	315	155	179
16220426	Indet.	Paracou	285511	580981	55	H3	330	332	303	307	181	189
16230015	Indet.	Paracou	285538	581009	55	H3	318	324	303	321	155	189
16230063	Indet.	Paracou	285525	581068	49	H2	322	322	307	307	167	179
16230110	Indet.	Paracou	285534	581085	46	H1	326	326	307	307	167	171
16230118	Indet.	Paracou	285540	581078	46	H1	322	322	307	307	155	179
16230190	Indet.	Paracou	285554	581013	55	H3	334	334	299	303	157	167
16230230	Indet.	Paracou	285573	581026	52	H2	304	324	303	305	167	177
16230382	Indet.	Paracou	285580	581074	48	H1	318	324	307	307	155	171
16230437	Indet.	Paracou	285593	581021	53	H3	322	322	307	321	155	167
16230439	Indet.	Paracou	285587	581026	53	H3	304	332	299	303	171	185
16240010	Indet.	Paracou	285643	581020	54	H3	324	332	313	313	151	179
16240011	Indet.	Paracou	285640	581022	54	H3	316	324	299	315	151	183
16240020	Indet.	Paracou	285629	581038	54	H3	324	324	303	305	167	175
16240068	Indet.	Paracou	285622	581076	54	H3	318	318	303	307	167	179
16240170	Indet.	Paracou	285644	581034	54	H3	332	332	303	303	167	189
16240259	Indet.	Paracou	285669	581074	53	H3	324	324	297	305	167	189
16240323	Indet.	Paracou	285659	581125	51	H2	324	324	307	307	173	175
16240408	Indet.	Paracou	285695	581050	53	H3	328	328	303	307	151	197
16240509	Indet.	Paracou	285706	581095	50	H2	324	338	307	307	155	197
16250035	sp.1	Paracou	285716	581080	49	H2	318	318	0	0	157	163
16250085	sp.1	Paracou	285708	581139	48	H1	318	324	313	313	183	197
16250107	sp.1	Paracou	285720	581143	47	H1	324	324	303	321	155	197
16250179	sp.1	Paracou	285753	581075	55	H3	308	318	307	307	155	181
16250202	sp.1	Paracou	285731	581077	49	H2	322	338	314	321	155	197
16250211	sp.1	Paracou	285738	581053	53	H3	310	324	0	0	171	173
16250254	sp.1	Paracou	285753	581092	52	H2	318	342	303	307	151	197
16250308	sp.1	Paracou	285749	581141	48	H1	324	330	307	315	155	173
16250318	sp.1	Paracou	285738	581145	47	H1	324	324	297	307	179	197

## Sheet: Yasuni
Individuals, population, UTM coordinates and SSR genotypes						UTM zone: 18S
Individuals	Population	X	Y	Altitude (m)	Altitude class	Sg19		SgC4		Sg92		Sg03		Sg06
10175	Yasuni	344753	9.92417e+06	248	H2	178	184	160	164	168	180	0	0	208	208
11364	Yasuni	344755	9.92427e+06	258	H3	182	182	0	0	168	180	0	0	220	234
35000	Yasuni	344787	9.92452e+06	241	H2	182	184	168	174	168	172	312	318	202	226
40404	Yasuni	344815	9.9242e+06	255	H3	170	172	156	160	168	168	316	318	234	244
71227	Yasuni	344871	9.92427e+06	240	H1	166	182	0	0	180	180	0	0	220	240
71744	Yasuni	344869	9.92432e+06	248	H2	182	190	154	168	168	180	316	318	208	208
75803	Yasuni	344861	9.92463e+06	249	H2	166	174	166	166	180	180	318	318	208	218
84144	Yasuni	344890	9.92451e+06	262	H3	182	184	168	170	168	180	314	316	208	230
89871	Yasuni	344889	9.92425e+06	240	H1	172	182	0	0	180	180	342	342	0	0
100724	Yasuni	344924	9.92424e+06	240	H2	166	176	156	160	180	180	316	318	220	220
104514	Yasuni	344925	9.92456e+06	254	H3	166	186	0	0	180	180	0	0	202	208
114505	Yasuni	344950	9.92454e+06	261	H3	170	182	164	184	180	180	0	0	0	0
121550	Yasuni	344961	9.92429e+06	241	H2	174	174	0	0	168	168	0	0	228	242
125905	Yasuni	344973	9.92465e+06	244	H2	174	186	166	174	180	180	318	318	234	234
132396	Yasuni	344984	9.92434e+06	251	H3	166	182	166	180	180	180	316	318	208	234
135137	Yasuni	344984	9.92458e+06	262	H3	0	0	154	156	180	180	318	326	202	234
156434	Yasuni	345034	9.92466e+06	258	H3	170	182	164	170	180	182	314	314	208	234
160415	Yasuni	345056	9.9242e+06	235	H1	172	176	156	168	180	180	314	318	0	0
165711	Yasuni	345042	9.92461e+06	246	H2	180	186	154	168	166	170	316	328	208	232
170263	Yasuni	345063	9.92418e+06	235	H1	172	182	166	168	180	180	0	0	232	232
174924	Yasuni	345073	9.9245e+06	241	H2	174	182	164	174	180	180	0	0	0	0
200474	Yasuni	345128	9.92419e+06	241	H2	170	182	168	174	168	180	316	316	234	244
204033	Yasuni	345121	9.9245e+06	240	H2	174	182	154	164	180	180	312	316	208	242
205034	Yasuni	345120	9.92457e+06	266	H3	172	182	154	168	180	180	0	0	220	234
220737	Yasuni	345172	9.92421e+06	239	H1	174	174	156	166	172	180	0	0	224	234
221444	Yasuni	345174	9.92424e+06	234	H1	172	182	168	168	180	182	318	326	196	202
222468	Yasuni	345160	9.92433e+06	235	H1	176	184	164	166	166	180	318	322	0	0
230866	Yasuni	345192	9.9242e+06	236	H1	156	188	178	188	170	182	318	326	234	244
232120	Yasuni	345195	9.92429e+06	231	H1	0	0	158	168	180	180	0	0	234	244
234163	Yasuni	345188	9.9245e+06	245	H2	172	182	168	174	166	180	312	318	208	234
240341	Yasuni	345200	9.92418e+06	236	H1	166	182	164	168	180	180	312	318	0	0
240876	Yasuni	345215	9.92421e+06	236	H1	184	184	164	168	180	180	314	314	220	228
244949	Yasuni	345202	9.92454e+06	271	H3	172	172	160	168	168	180	316	320	208	234
246118	Yasuni	345206	9.92462e+06	273	H3	170	176	168	168	180	182	0	0	232	232

## Sheet: BCI
Individuals, population, UTM coordinates and SSR genotypes						UTM zone: 17N
Individuals	Population	x	y	Altitude (m)	Altitude class	Sg19		SgC4		Sg92		Sg03		Sg06
BCI000329	BCI	626717	1.0122e+06	157	H1	160	160	166	186	180	180	316	316	194	194
BCI000884	BCI	626669	1.01194e+06	166	H2	178	178	170	176	180	182	312	318	176	200
BCI001035	BCI	626642	1.01218e+06	180	H3	170	174	166	176	180	186	0	0	196	196
BCI001151	BCI	626644	1.01183e+06	158	H1	178	178	164	166	180	180	0	0	184	186
BCI002457	BCI	626482	1.01217e+06	166	H2	170	176	164	166	176	180	318	318	176	176
BCI007831	BCI	625843	1.01222e+06	171	H2	160	170	164	188	176	176	0	0	184	184
BCI008465	BCI	625775	1.01209e+06	173	H2	170	178	168	168	176	176	312	312	178	194
BCI012055	BCI	626738	1.01217e+06	166	H2	160	174	170	172	178	182	312	312	188	194
BCI012446	BCI	626745	1.01221e+06	155	H1	168	174	166	166	178	182	318	318	176	200
BCI012520	BCI	626737	1.01223e+06	149	H1	170	176	164	170	180	184	0	0	192	210
BCI012638	BCI	626735	1.01223e+06	149	H1	160	174	168	172	178	182	312	312	186	194
BCI012870	BCI	626744	1.01226e+06	157	H1	170	178	166	168	180	180	314	314	188	210
BCI018273	BCI	626624	1.0121e+06	176	H2	160	168	164	166	182	182	314	314	176	176
BCI018411	BCI	626626	1.01212e+06	185	H3	170	178	166	178	176	182	316	318	176	200
BCI021006	BCI	626720	1.01191e+06	160	H1	178	178	166	166	176	184	314	318	196	200
BCI024189	BCI	626727	1.01222e+06	149	H1	174	174	174	186	176	180	316	318	186	200
BCI024324	BCI	626720	1.01224e+06	149	H1	174	176	170	172	176	182	0	0	176	194
BCI029401	BCI	626700	1.01223e+06	151	H1	174	174	172	174	176	176	0	0	194	200
BCI029843	BCI	626704	1.01227e+06	151	H1	162	162	166	178	180	184	316	316	184	200
BCI032964	BCI	626683	1.01208e+06	182	H3	160	160	170	172	176	180	0	0	194	210
BCI037985	BCI	626671	1.01213e+06	176	H2	168	178	166	188	172	190	314	318	194	194
BCI038310	BCI	626664	1.01216e+06	175	H2	174	174	174	192	178	182	312	318	178	200
BCI039031	BCI	626658	1.01223e+06	160	H1	170	174	174	178	176	178	316	318	184	200
BCI039337	BCI	626666	1.01227e+06	160	H1	168	174	166	174	180	196	314	314	184	184
BCI042171	BCI	626645	1.01204e+06	188	H3	168	174	168	174	180	186	318	318	184	206
BCI042557	BCI	626647	1.0121e+06	176	H2	174	174	172	174	180	180	312	312	194	194
BCI042641	BCI	626637	1.01212e+06	185	H3	168	174	166	172	176	180	314	318	200	210
BCI042658	BCI	626634	1.01213e+06	185	H3	170	174	170	178	180	180	314	314	184	210
BCI043303	BCI	626640	1.0122e+06	180	H3	160	168	174	178	176	176	318	318	200	200
BCI043444	BCI	626637	1.01223e+06	178	H3	168	170	166	176	172	178	318	318	188	188
BCI043467	BCI	626643	1.01223e+06	178	H3	160	170	174	182	176	180	318	318	184	200
BCI043694	BCI	626650	1.01224e+06	174	H2	160	170	168	170	170	174	312	312	176	200
BCI052458	BCI	626595	1.01203e+06	194	H3	166	166	166	188	174	174	318	318	196	200
BCI052722	BCI	626608	1.01205e+06	194	H3	166	168	172	188	174	174	318	318	200	210
BCI054017	BCI	626604	1.01221e+06	189	H3	172	174	166	174	176	176	316	316	188	188
BCI054076	BCI	626604	1.01221e+06	189	H3	160	174	164	174	180	180	316	316	206	210
BCI055709	BCI	626592	1.01186e+06	166	H2	168	178	166	176	180	180	316	316	200	200
BCI055711	BCI	626591	1.01186e+06	166	H2	160	166	172	178	180	196	316	318	200	206
BCI064682	BCI	626569	1.01225e+06	182	H3	160	174	164	166	0	0	316	316	188	206
BCI083752	BCI	626475	1.01225e+06	183	H3	160	178	164	166	176	180	314	318	176	200
BCI100064	BCI	626401	1.01178e+06	178	H3	160	176	164	168	174	176	314	318	188	196
BCI128510	BCI	626770	1.01213e+06	159	H1	174	178	164	168	164	178	314	316	176	194
BCI133570	BCI	626296	1.0122e+06	192	H3	160	170	166	188	180	186	314	314	178	178
BCI142827	BCI	626265	1.01207e+06	187	H3	172	172	164	166	172	176	314	314	176	200
BCI143282	BCI	626266	1.01212e+06	196	H3	172	174	174	176	0	0	314	314	184	184
BCI145855	BCI	626249	1.01186e+06	177	H2	172	174	166	178	166	184	314	314	198	210
BCI146992	BCI	626244	1.012e+06	177	H2	168	170	174	180	176	180	314	318	184	198
BCI149092	BCI	626246	1.01227e+06	186	H3	160	170	166	168	170	178	314	314	210	210
BCI150305	BCI	626230	1.0118e+06	161	H1	174	174	164	168	174	176	312	312	178	184
BCI153503	BCI	626233	1.01222e+06	189	H3	160	170	166	168	174	174	314	314	194	200
BCI160048	BCI	626181	1.01178e+06	164	H1	160	178	166	168	174	174	314	314	194	196
BCI160356	BCI	626180	1.01181e+06	164	H1	160	166	166	168	172	176	314	316	176	200
BCI168596	BCI	626160	1.01227e+06	173	H2	160	170	186	188	178	186	314	314	178	200
BCI173857	BCI	626142	1.01226e+06	167	H2	178	178	0	0	174	182	314	314	176	196
BCI175810	BCI	626125	1.01188e+06	174	H2	160	160	168	174	176	186	314	314	184	196
BCI185636	BCI	626090	1.01182e+06	162	H1	170	170	168	174	174	176	314	318	184	194
BCI185649	BCI	626091	1.01182e+06	162	H1	170	170	168	174	174	176	318	318	184	194
BCI188898	BCI	626075	1.01221e+06	173	H2	162	162	162	178	174	174	318	318	194	194
BCI189192	BCI	626083	1.01223e+06	173	H2	160	172	164	176	170	184	314	316	186	196
BCI214037	BCI	625979	1.01219e+06	177	H2	170	178	164	176	174	174	314	316	178	194
BCI215005	BCI	625956	1.01177e+06	164	H1	0	0	172	172	178	188	316	316	200	200
BCI218310	BCI	625956	1.01214e+06	168	H2	166	180	164	178	170	178	314	316	188	194
BCI225832	BCI	625922	1.01189e+06	172	H2	172	174	164	178	174	174	314	316	176	200
BCI226721	BCI	625925	1.01198e+06	173	H2	168	170	166	174	170	176	314	318	176	194
BCI228527	BCI	625927	1.01217e+06	185	H3	174	178	164	178	166	182	318	318	186	196
BCI230725	BCI	625899	1.01187e+06	171	H2	168	178	166	178	174	176	318	318	198	210
BCI237239	BCI	625876	1.01205e+06	173	H2	174	178	162	168	182	186	314	318	196	196
BCI239549	BCI	625888	1.01226e+06	176	H2	174	178	166	176	172	176	314	314	194	200
BCI240071	BCI	625862	1.01178e+06	156	H1	160	174	162	178	176	180	312	312	196	200
BCI241552	BCI	625857	1.01195e+06	171	H2	174	174	166	168	174	174	318	322	176	200
BCI242203	BCI	625861	1.012e+06	172	H2	160	172	168	172	176	180	314	318	194	198
BCI245756	BCI	625846	1.01186e+06	164	H1	172	178	166	178	174	174	314	318	200	200
BCI247211	BCI	625850	1.012e+06	172	H2	174	178	166	178	174	174	314	318	196	196
BCI248824	BCI	625850	1.01214e+06	179	H3	174	178	162	176	174	176	314	318	196	196
BCI254134	BCI	625818	1.01219e+06	179	H3	166	178	164	178	176	176	314	318	188	200
BCI255029	BCI	625794	1.01179e+06	152	H1	172	172	166	172	174	174	0	0	176	210
BCI256014	BCI	625807	1.01188e+06	162	H1	172	175	164	172	174	180	318	322	176	184
BCI260004	BCI	625775	1.01178e+06	152	H1	172	172	166	168	174	174	318	318	176	200
BCI261013	BCI	625790	1.0119e+06	162	H1	174	174	166	180	174	174	322	322	176	200
BCI261083	BCI	625783	1.01193e+06	162	H1	164	168	162	178	168	174	322	322	176	184
BCI261732	BCI	625782	1.01198e+06	168	H2	174	178	168	178	180	180	316	316	176	200
BCI263868	BCI	625786	1.01223e+06	170	H2	170	170	166	176	176	176	314	314	194	200
BCI263924	BCI	625790	1.01222e+06	170	H2	170	170	166	166	174	180	314	314	176	194
BCI289410	BCI	626256	1.01212e+06	189	H3	170	170	166	174	174	180	318	318	176	198
BCI292095	BCI	626333	1.01185e+06	178	H3	168	174	172	174	176	176	312	318	194	200
BCI307491	BCI	626626	1.0121e+06	176	H2	166	170	166	176	174	174	318	318	210	210
BCI307515	BCI	626628	1.01212e+06	185	H3	160	170	166	176	176	180	318	318	184	184
BCI307518	BCI	626633	1.01212e+06	185	H3	168	168	166	178	176	176	318	318	176	184
BCI307519	BCI	626630	1.01212e+06	185	H3	168	170	166	166	176	180	314	314	184	200
BCI308909	BCI	626646	1.01222e+06	178	H3	158	164	178	184	176	182	314	314	176	200
BCI310316	BCI	626675	1.01205e+06	179	H3	170	174	166	176	180	180	314	318	200	200
BCI310526	BCI	626690	1.01217e+06	167	H2	174	178	178	188	176	180	318	318	188	210
BCI310606	BCI	626685	1.01222e+06	151	H1	170	174	166	178	176	180	312	314	194	200
BCI310622	BCI	626689	1.01222e+06	151	H1	168	170	178	186	176	180	0	0	184	200
BCI314568	BCI	626773	1.01224e+06	157	H1	160	172	172	188	174	176	312	318	192	198
BCI401787	BCI	626113	1.01226e+06	171	H2	174	178	188	188	180	196	312	318	184	192
BCI402231	BCI	625818	1.012e+06	170	H2	160	178	166	176	174	178	314	318	188	200
BCI418050	BCI	626147	1.01181e+06	165	H1	160	182	168	188	178	180	314	318	194	198
BCI421028	BCI	626209	1.01179e+06	166	H2	174	178	168	188	176	180	314	314	194	198
BCI422088	BCI	626231	1.01181e+06	161	H1	174	176	164	178	176	178	316	318	184	184
BCI422130	BCI	626224	1.01183e+06	181	H3	160	170	170	180	178	182	312	318	198	198
BCI423924	BCI	626238	1.01217e+06	185	H3	160	160	172	186	174	174	312	312	178	188
BCI425131	BCI	626287	1.01187e+06	176	H2	174	178	166	178	0	0	312	318	188	200
BCI425635	BCI	626288	1.01222e+06	188	H3	174	182	166	172	174	180	312	318	196	196
BCI429008	BCI	626365	1.01177e+06	167	H2	160	168	164	170	174	176	312	312	184	210
BCI436108	BCI	626507	1.01187e+06	172	H2	160	170	164	166	176	178	314	318	176	176
BCI441551	BCI	626600	1.01206e+06	182	H3	170	172	188	188	178	182	312	312	176	200
BCI442040	BCI	626618	1.01181e+06	153	H1	160	172	174	178	176	186	318	318	176	176
BCI445337	BCI	626692	1.01204e+06	167	H2	168	170	166	176	182	196	318	318	202	202
BCI446682	BCI	626707	1.01219e+06	164	H1	170	174	166	166	178	180	312	314	184	188
BCI449567	BCI	626755	1.01219e+06	157	H1	170	170	170	172	180	196	312	312	184	190
BCI500132	BCI	625781	1.01197e+06	168	H2	178	178	166	188	174	178	0	0	194	200
BCI503036	BCI	625841	1.0118e+06	156	H1	174	178	0	0	174	174	168	170	194	210
BCI520037	BCI	626180	1.01179e+06	164	H1	174	178	166	186	174	180	314	318	196	196
BCI525029	BCI	626291	1.01183e+06	178	H3	174	182	164	172	176	178	312	318	184	196
BCI525056	BCI	626275	1.01188e+06	176	H2	168	174	164	164	176	180	312	312	196	196
BCI528051	BCI	626348	1.01187e+06	178	H3	174	182	164	168	176	178	318	318	184	196
BCI541176	BCI	626599	1.01206e+06	182	H3	170	170	166	172	180	180	314	314	176	184
BCI542333	BCI	626615	1.01212e+06	189	H3	170	170	170	178	176	178	318	318	184	184
BCI542381	BCI	626622	1.01211e+06	187	H3	170	170	166	172	180	180	312	318	0	0
BCI542386	BCI	626625	1.01212e+06	185	H3	168	170	166	178	174	180	314	314	184	200
BCI542399	BCI	626628	1.01212e+06	185	H3	170	174	170	178	176	180	318	318	188	210
BCI543299	BCI	626646	1.01216e+06	188	H3	170	170	172	178	178	180	312	318	184	184
BCI543309	BCI	626649	1.01218e+06	180	H3	168	180	166	172	176	196	318	318	190	200
BCI544946	BCI	626667	1.01194e+06	166	H2	168	174	164	176	180	188	318	318	200	200
BCI548243	BCI	626748	1.01219e+06	157	H1	170	178	164	176	178	180	312	318	188	210
BCI548256	BCI	626750	1.0122e+06	157	H1	158	174	0	0	176	180	312	312	194	200
BCI606016	BCI	625901	1.01185e+06	171	H2	174	178	170	180	174	174	312	318	184	210
BCI607090	BCI	625922	1.01186e+06	171	H2	160	172	166	172	174	180	314	318	200	200
BCI607184	BCI	625922	1.01201e+06	175	H2	174	174	164	176	174	174	312	318	0	0
BCI608375	BCI	626121	1.01187e+06	172	H2	168	176	166	172	190	196	314	318	198	198
BCI618004	BCI	626138	1.01179e+06	165	H1	170	174	176	188	180	186	314	314	188	194
BCI624296	BCI	626572	1.01201e+06	191	H3	170	174	172	172	176	180	318	318	194	200
BCI627006	BCI	626332	1.01178e+06	172	H2	160	168	164	166	174	176	312	312	196	196
BCI634034	BCI	626466	1.01186e+06	178	H3	174	178	166	176	180	180	312	318	174	192
BCI639244	BCI	626573	1.01212e+06	189	H3	160	174	166	178	176	180	318	318	184	200
BCI641283	BCI	626606	1.01224e+06	189	H3	160	168	172	174	176	176	292	306	194	200
BCI643241	BCI	626648	1.01223e+06	178	H3	160	174	166	172	172	182	312	318	194	200
BCI644119	BCI	626673	1.01194e+06	166	H2	178	178	168	176	178	180	312	318	176	186
BCI644374	BCI	626666	1.01227e+06	160	H1	176	182	174	182	0	0	292	308	188	200
BCI645391	BCI	626690	1.01213e+06	170	H2	168	174	172	174	176	180	312	318	0	0
BCI645447	BCI	626676	1.01219e+06	179	H3	160	168	174	178	176	176	314	318	0	0
BCI645484	BCI	626675	1.01227e+06	160	H1	174	180	172	188	180	184	318	318	0	0
BCI646538	BCI	626700	1.01227e+06	151	H1	160	170	172	178	176	180	312	318	192	198
BCI646539	BCI	626700	1.01227e+06	151	H1	160	170	166	178	176	180	318	318	194	200
BCI648322	BCI	626749	1.01226e+06	157	H1	160	174	172	172	176	176	318	318	194	200
BCI649312	BCI	626755	1.01219e+06	157	H1	162	174	168	178	166	180	316	316	176	194

## Sheet: Itubera
Individuals, population, UTM coordinates and SSR genotypes						UTM zone: 24S
Individuals	Population	x	y	Altitude (m)	Altitude class	Sg03		SgC4		Sg18		Sg19		Sg10
KH01	Itubera	480883	8475887	99	H1	318	318	179	187	300	304	174	178	162	164
KH02	Itubera	480880	8475879	101	H1	318	320	179	179	300	304	178	178	166	192
KH03	Itubera	480765	8475659	124	H2	320	320	177	183	304	304	174	178	156	170
KH04	Itubera	480765	8475635	124	H2	320	320	177	187	304	304	174	174	160	198
KH05	Itubera	480726	8475460	108	H1	320	320	169	183	300	304	174	174	156	196
KH06	Itubera	480680	8475254	112	H1	320	320	177	183	304	304	174	178	148	180
KH07	Itubera	480613	8474903	102	H1	320	320	169	185	304	304	174	174	160	180
KH08	Itubera	480600	8474882	97	H1	320	320	169	187	304	304	174	174	156	172
KH09	Itubera	480520	8474760	97	H1	320	320	175	185	304	308	174	174	143	143
KH10	Itubera	480848	8475841	100	H1	320	320	183	187	304	304	176	176	150	182
KH11	Itubera	480802	8.47569e+06	118	H2	318	318	177	177	304	304	174	178	152	164
KH12	Itubera	480734	8475504	108	H1	320	320	181	183	304	304	174	174	152	172
KH13	Itubera	480665	8475249	112	H1	320	320	177	179	300	304	174	176	170	182
KH14	Itubera	480660	8475068	132	H2	320	320	181	183	300	304	166	176	172	198
KH15	Itubera	480666	8475011	118	H2	320	320	179	183	304	308	174	174	152	154
KH16	Itubera	480613	8474899	102	H1	318	318	183	187	304	304	174	178	156	160
KH17	Itubera	480579	8474853	100	H1	320	320	177	179	304	308	174	174	160	186
KH18	Itubera	480536	8474810	92	H1	0	0	177	179	304	310	174	178	162	186
KH19	Itubera	480518	8474790	92	H1	320	320	173	179	300	300	174	174	170	172
KH20	Itubera	480528	8474769	97	H1	320	320	173	181	300	308	176	178	164	185
KH21	Itubera	480518	8474764	97	H1	320	320	175	185	304	308	174	174	143	143
KH22	Itubera	480514	8474762	97	H1	320	320	175	185	304	308	174	174	143	143
KH23	Itubera	480467	8474509	124	H2	318	320	175	183	304	304	174	174	114	114
KH24	Itubera	480459	8474467	153	H3	320	320	177	183	304	304	174	178	164	164
KH25	Itubera	480729	8475409	118	H2	318	318	173	181	304	304	174	178	156	160
KH26	Itubera	480725	8475410	118	H2	318	318	173	181	304	304	174	178	156	160
KH27	Itubera	480475	8474653	94	H1	320	320	175	183	304	304	174	174	114	156
KH28	Itubera	480431	8.47452e+06	128	H2	320	320	169	175	300	300	172	174	114	150
KH29	Itubera	480446	8.47454e+06	128	H2	320	320	175	179	300	304	174	178	152	156
KH31	Itubera	480657	8475031	128	H2	320	320	177	183	308	308	174	174	152	156
KH32	Itubera	480702	8475352	116	H2	320	320	179	185	304	308	174	174	152	160
KH33	Itubera	480482	8474709	100	H1	320	320	179	183	304	304	163	174	143	166
KH34	Itubera	480501	8474712	106	H1	320	320	177	179	300	300	174	176	156	156
KH35	Itubera	480507	8474710	106	H1	318	318	173	185	300	310	174	174	156	162
KH36	Itubera	480394	8474778	142	H3	320	320	179	190	304	304	174	176	156	180
KH37	Itubera	480380	8474813	142	H3	320	320	177	181	300	304	174	174	143	166
KH38	Itubera	480379	8474818	142	H3	320	320	175	181	300	304	174	176	156	202
KH39	Itubera	480365	8474840	138	H3	320	320	177	179	300	300	174	174	143	185
KH40	Itubera	480363	8474908	156	H3	320	320	183	183	304	308	174	174	156	166
KH41	Itubera	480396	8474880	135	H3	320	320	183	190	304	304	174	174	152	168
KH42	Itubera	480383	8474859	144	H3	320	320	183	190	304	304	174	174	152	168
KH43	Itubera	480384	8474885	144	H3	318	320	183	190	304	304	174	174	152	168
KH45	Itubera	480748	8.47553e+06	114	H2	320	320	181	187	304	304	174	174	148	162
KH46	Itubera	480371	8474368	121	H2	320	320	179	183	308	308	174	178	188	206
KH48	Itubera	480492	8474739	106	H1	320	320	179	179	304	310	174	178	152	160
KH49	Itubera	480488	8474736	106	H1	320	322	169	185	304	304	174	174	152	180
KH50	Itubera	480872	8.47586e+06	108	H1	320	320	173	179	304	308	174	176	143	162
KH51	Itubera	480632	8474992	127	H2	320	320	183	183	304	304	174	176	154	154
KH52	Itubera	480644	8.475e+06	128	H2	320	320	179	183	300	304	174	174	164	164
KH53	Itubera	480660	8475011	128	H2	320	320	169	183	304	308	174	174	152	180
KH54	Itubera	480653	8475007	128	H2	318	320	183	183	304	304	174	174	156	164
KH55	Itubera	480533	8475054	129	H2	320	322	167	179	300	304	174	176	162	164
KH56	Itubera	480459	8475057	135	H3	322	322	179	185	300	304	174	174	152	164
KH57	Itubera	480398	8.47512e+06	152	H3	320	320	177	179	304	308	174	176	156	164
KH58	Itubera	480544	8475101	132	H2	320	320	177	181	304	308	174	176	160	180
KH60	Itubera	480602	8475082	147	H3	320	320	179	183	304	304	174	174	180	190
KH61	Itubera	480608	8.47508e+06	150	H3	318	318	181	185	304	304	174	176	114	143
KH62	Itubera	480645	8475065	132	H2	320	320	179	179	304	308	174	174	156	182
KH63	Itubera	480643	8475067	132	H2	320	320	177	179	304	308	174	178	156	180
KH64	Itubera	480641	8.47507e+06	132	H2	318	318	179	181	300	304	174	174	158	190
KH65	Itubera	480638	8475071	138	H3	320	320	179	185	304	304	174	174	143	164
KH66	Itubera	480631	8.47507e+06	140	H3	320	322	173	179	304	304	174	174	156	164
KH67	Itubera	480621	8475069	150	H3	320	320	177	179	300	304	174	174	164	190
KH68	Itubera	480620	8.47506e+06	140	H3	320	320	177	179	300	304	174	174	160	198
KH69	Itubera	480621	8475068	140	H3	320	320	177	179	304	304	174	174	114	154
KH70	Itubera	480620	8475061	140	H3	318	318	177	183	304	304	174	174	152	186
KH71	Itubera	480623	8475061	140	H3	320	320	177	177	304	304	163	174	176	186
KH72	Itubera	480573	8475099	136	H3	318	320	175	177	300	304	174	178	152	152
KH73	Itubera	480620	8475064	140	H3	318	318	181	181	304	308	174	178	148	180
KH74	Itubera	480725	8475467	110	H1	320	320	177	179	304	304	174	174	156	180
KH75	Itubera	480461	8474613	111	H1	320	322	173	183	300	304	174	176	156	156
KH76	Itubera	480452	8474578	118	H2	318	318	177	183	304	304	174	174	150	158
KH77	Itubera	480452	8474566	118	H2	318	318	179	183	304	304	174	174	162	180
KH78	Itubera	480474	8474658	94	H1	320	320	183	183	300	304	174	176	156	164
KH79	Itubera	480485	8474747	101	H1	320	320	171	181	300	304	166	176	172	172
KH81	Itubera	480402	8474795	124	H2	320	320	173	175	300	304	174	176	172	210
KH82	Itubera	480392	8474739	127	H2	320	322	177	185	300	304	174	176	156	160
KH83	Itubera	480384	8474724	127	H2	318	318	173	179	300	304	174	178	172	176
KH84	Itubera	480389	8474805	142	H3	322	322	179	185	304	304	174	178	150	156
KH85	Itubera	480376	8474839	138	H3	320	320	179	179	304	310	176	178	143	188
KH86	Itubera	480377	8474837	138	H3	320	320	177	179	300	304	176	186	114	143
KH87	Itubera	480390	8474851	138	H3	320	320	177	179	304	304	174	176	152	190
KH88	Itubera	480386	8474867	144	H3	318	320	183	190	304	304	174	174	152	168
KH89	Itubera	480394	8474866	144	H3	318	318	183	190	304	304	174	174	152	168
KH90	Itubera	480357	8.47493e+06	164	H3	320	320	183	183	300	304	174	174	172	198

## Sheet: Mbikiliki
Individuals, population, UTM coordinates and SSR genotypes						UTM zone: 32N
Individuals	Population	x	y	Altitude (m)	Altitude class	Sg03		SgC4		Sg18		Sg19		Sg10
MH2503	Mbikiliki	669698	352704	727	H2	332	332	177	177	305	305	168	170	118	130
MH2504	Mbikiliki	669704	352704	727	H2	332	334	151	190	310	310	166	166	118	124
MH2505	Mbikiliki	669690	352684	735	H2	332	334	173	190	310	310	166	166	118	124
MH2506	Mbikiliki	669754	352602	772	H2	332	334	173	183	310	310	166	168	132	172
MH2508	Mbikiliki	669721	352577	778	H2	332	334	163	190	306	310	159	166	118	185
MH2509	Mbikiliki	669699	352571	778	H2	322	332	161	173	310	310	168	168	118	128
MH2510	Mbikiliki	669681	352578	778	H2	332	334	177	190	310	310	166	178	118	134
MH2511	Mbikiliki	669655	352589	775	H2	332	334	175	190	308	310	166	178	136	185
MH2512	Mbikiliki	669640	352569	780	H2	332	332	173	190	308	310	166	178	130	185
MH2514	Mbikiliki	669619	352578	783	H2	332	334	175	179	310	310	166	166	114	185
MH2515	Mbikiliki	669597	352508	784	H2	332	334	161	179	305	310	166	166	118	134
MH2517	Mbikiliki	669594	352505	784	H2	332	337	165	173	310	310	166	168	118	136
MH2518	Mbikiliki	669583	352506	784	H2	332	332	173	183	310	310	161	166	124	136
MH2519	Mbikiliki	669558	352500	799	H3	332	332	173	175	306	306	166	178	114	146
MH2520	Mbikiliki	669553	352499	799	H3	332	332	167	190	310	310	161	178	120	185
MH2521	Mbikiliki	669551	352488	799	H3	332	334	157	190	308	308	166	168	185	185
MH2522	Mbikiliki	669549	352481	786	H2	332	334	179	179	308	312	166	168	128	185
MH2527	Mbikiliki	669414	352276	829	H3	332	334	177	177	305	305	166	166	120	185
MH2528	Mbikiliki	669400	352262	835	H3	330	332	163	190	305	310	159	161	118	185
MH2529	Mbikiliki	669275	352212	853	H3	332	334	190	190	308	310	166	182	118	118
MH2531	Mbikiliki	669622	352617	770	H2	332	334	175	179	310	310	166	166	130	134
MH2536	Mbikiliki	669520	352862	743	H2	334	334	175	190	312	312	166	166	118	132
MH2537	Mbikiliki	669505	352877	746	H2	332	332	175	177	305	305	176	176	114	178
MH2538	Mbikiliki	669482	352892	751	H2	317	332	161	173	310	320	166	168	126	128
MH2540	Mbikiliki	669297	352987	764	H2	322	322	179	196	320	320	168	170	128	128
MH2542	Mbikiliki	669129	353229	753	H2	330	332	157	175	305	306	170	180	114	134
MH2543	Mbikiliki	669121	353226	753	H2	332	332	167	177	305	306	165	170	136	152
MH2547	Mbikiliki	669025	353264	794	H2	332	332	179	185	305	305	166	168	114	136
MH2550	Mbikiliki	669026	353331	834	H3	332	334	171	175	306	306	166	168	114	128
MH2552	Mbikiliki	669056	353423	858	H3	332	332	157	177	306	306	166	166	136	158
MH2554	Mbikiliki	669079	353474	860	H3	332	334	167	167	305	306	166	166	134	158
MH2555	Mbikiliki	669081	353470	857	H3	332	332	175	175	306	306	161	165	134	172
MH2557	Mbikiliki	669222	353480	852	H3	334	334	177	179	306	306	166	182	158	162
MH2558	Mbikiliki	669239	353483	866	H3	332	337	165	207	305	305	166	166	114	170
MH2559	Mbikiliki	669268	353498	886	H3	332	332	161	179	306	306	166	172	172	192
MH2560	Mbikiliki	669265	353505	870	H3	332	334	161	175	306	306	161	166	114	196
MH2561	Mbikiliki	669272	353485	886	H3	332	332	159	179	306	306	166	172	114	158
MH2564	Mbikiliki	669346	353494	884	H3	332	332	173	207	305	306	166	178	128	136
MH2565	Mbikiliki	669351	353495	884	H3	332	332	165	175	306	306	161	188	158	160
MH2566	Mbikiliki	669344	353506	901	H3	332	334	165	165	306	312	161	166	128	160
MH2567	Mbikiliki	669332	353506	901	H3	332	334	159	165	306	312	166	166	160	162
MH2568	Mbikiliki	669350	353516	901	H3	332	334	165	177	306	306	166	178	160	164
MH2569	Mbikiliki	669365	353539	911	H3	332	332	171	171	306	306	161	176	114	166
MH2570	Mbikiliki	669388	353545	911	H3	332	334	165	175	305	306	166	182	128	134
MH2571	Mbikiliki	669402	353527	911	H3	334	334	175	177	306	306	161	166	114	164
MH2572	Mbikiliki	669396	353463	881	H3	332	332	165	185	306	306	166	166	114	128
MH2573	Mbikiliki	669383	353457	885	H3	332	332	171	175	306	306	166	172	154	158
MH2575	Mbikiliki	669189	353395	821	H3	332	332	165	173	306	308	161	172	120	172
MH2577	Mbikiliki	669179	353381	821	H3	332	334	165	179	306	306	159	172	130	172
MH2578	Mbikiliki	669159	353346	795	H3	332	337	173	173	306	306	161	180	118	143
MH2579	Mbikiliki	669126	353289	779	H2	332	334	157	175	306	306	161	170	176	176
MH2580	Mbikiliki	669100	353302	794	H3	332	334	157	161	306	306	166	182	128	176
MH2582	Mbikiliki	669108	353276	772	H2	332	332	161	167	306	306	170	170	114	154
MH2583	Mbikiliki	669222	353076	758	H2	332	334	165	183	305	306	166	180	116	128
MH2586	Mbikiliki	669554	352837	734	H2	332	332	165	165	306	306	166	178	114	158
MH2587	Mbikiliki	669598	352823	734	H2	332	334	175	175	306	308	166	170	120	172
MH2589	Mbikiliki	669983	352273	743	H2	332	332	165	181	306	306	166	166	128	172
MH2590	Mbikiliki	669968	352262	746	H2	332	334	177	177	306	306	159	182	134	176
MH2592	Mbikiliki	669988	352230	733	H2	332	332	175	177	306	306	168	170	156	172
MH2596	Mbikiliki	670530	352002	554	H1	332	334	173	173	305	310	170	180	116	156
MH2600	Mbikiliki	670554	352019	554	H1	334	334	165	173	306	310	166	170	130	134
MH2610	Mbikiliki	670748	352180	569	H1	332	332	165	165	306	310	161	166	128	128
MH2615	Mbikiliki	670872	352246	574	H1	332	332	173	173	306	306	166	172	118	120
MH2620	Mbikiliki	670972	352317	584	H1	332	332	173	173	306	306	166	168	114	120
MH2623	Mbikiliki	670980	352341	601	H1	330	334	173	190	306	306	166	166	154	158
MH2625	Mbikiliki	671029	352329	572	H1	334	334	173	173	310	310	159	166	148	154
MH2626	Mbikiliki	671048	352345	582	H1	332	332	173	173	306	306	166	166	154	158
MH2628	Mbikiliki	671065	352345	582	H1	334	334	175	177	306	306	166	180	154	158
MH2629	Mbikiliki	671071	352363	582	H1	332	332	173	177	305	306	166	166	154	166
MH2630	Mbikiliki	671074	352392	582	H1	330	334	173	177	310	310	166	170	136	154
MH2631	Mbikiliki	671068	352395	589	H1	334	334	165	175	306	306	166	170	154	154
MH2632	Mbikiliki	671077	352418	589	H1	332	332	177	177	305	305	166	182	112	122
MH2633	Mbikiliki	671068	352445	600	H1	330	332	165	165	306	308	161	178	128	162
MH2635	Mbikiliki	671095	352406	579	H1	330	334	175	175	306	306	166	176	154	162
MH2636	Mbikiliki	671116	352386	571	H1	310	334	177	177	306	306	166	170	136	154
MH2638	Mbikiliki	671152	352386	569	H1	330	330	165	173	306	306	166	166	130	154
MH2640	Mbikiliki	671170	352414	575	H1	330	330	173	177	306	306	166	170	128	136
MH2642	Mbikiliki	671181	352413	567	H1	330	332	165	183	306	306	166	170	116	128
MH2646	Mbikiliki	671209	352356	551	H1	332	332	167	167	306	306	166	170	114	114
MH2648	Mbikiliki	671188	352361	561	H1	332	332	173	173	306	306	165	166	116	134
MH2649	Mbikiliki	671142	352360	569	H1	310	310	177	177	306	310	166	170	114	136
MH2651	Mbikiliki	671132	352352	571	H1	332	332	165	173	306	306	161	166	128	154
MH2655	Mbikiliki	670546	351989	554	H1	332	332	159	165	306	306	166	176	134	172
OH1263	Mbikiliki	671200	351318	493	H1	332	332	167	183	306	306	166	166	152	156
OH1264	Mbikiliki	670777	352180	569	H1	332	332	165	177	306	312	166	166	118	166
OH1265	Mbikiliki	670898	352556	637	H1	332	334	173	177	305	312	166	176	118	154
OH1290	Mbikiliki	670976	352335	601	H1	0	0	173	190	306	306	166	166	154	154
OH1291	Mbikiliki	670720	353065	837	H3	0	0	167	167	306	310	161	178	150	150
OH1292	Mbikiliki	670155	351737	603	H1	332	334	163	175	306	312	166	188	128	148
OH1293	Mbikiliki	669945	350576	467	H1	332	332	157	173	306	306	166	178	152	158
OH1294	Mbikiliki	669955	351869	669	H1	0	0	165	175	306	320	168	170	126	134
OH1295	Mbikiliki	669876	352068	729	H2	332	332	167	177	306	306	174	184	126	156
OH1299	Mbikiliki	669732	352157	814	H3	332	332	173	175	306	310	166	170	146	182
OH1300	Mbikiliki	669610	352046	850	H3	332	332	167	229	306	312	166	166	168	190

## Sheet: Nkong Mekak
Individuals, population, UTM coordinates and SSR genotypes						UTM zone: 32N
Individuals	Population	x	y	Altitude (m)	Altitude class	Sg03		SgC4		Sg18		Sg19		Sg10
MH1621	Nkong_Mekak	670593	308658	473	H1	332	332	175	177	305	310	176	180	114	128
MH1630	Nkong_Mekak	670682	308448	504	H1	332	332	177	179	306	310	161	182	122	122
MH2374	Nkong_Mekak	671137	304002	807	H3	332	337	181	183	306	310	159	165	124	136
MH2381	Nkong_Mekak	670843	305913	501	H1	332	334	165	179	306	306	161	166	136	148
MH2384	Nkong_Mekak	670644	305859	562	H1	332	332	177	229	306	306	166	166	143	158
MH2385	Nkong_Mekak	670529	305865	596	H1	332	332	159	169	312	312	161	170	132	156
MH2386	Nkong_Mekak	670508	305880	603	H1	332	332	167	167	306	306	166	176	136	158
MH2393	Nkong_Mekak	670360	305718	678	H1	332	332	165	165	306	306	165	182	114	148
MH2395	Nkong_Mekak	670388	305658	696	H2	332	334	175	175	305	308	168	182	148	172
MH2396	Nkong_Mekak	670398	305636	707	H2	332	334	177	187	306	310	161	172	128	136
MH2397	Nkong_Mekak	670383	305610	715	H2	332	334	157	171	306	306	178	178	152	156
MH2398	Nkong_Mekak	670387	305608	715	H2	332	334	165	165	305	305	159	178	152	156
MH2400	Nkong_Mekak	670375	305572	715	H2	332	332	171	175	306	306	159	165	158	158
MH2401	Nkong_Mekak	670388	305552	715	H2	332	332	157	175	306	306	166	166	112	152
MH2402	Nkong_Mekak	670384	305545	717	H2	332	332	175	175	305	305	166	166	118	152
MH2403	Nkong_Mekak	670378	305542	717	H2	332	332	165	173	305	310	166	172	128	158
MH2404	Nkong_Mekak	670378	305536	717	H2	332	332	171	175	305	306	159	182	152	158
MH2405	Nkong_Mekak	670367	305523	725	H2	332	334	177	177	306	310	176	178	130	158
MH2406	Nkong_Mekak	670368	305518	745	H2	332	332	175	177	306	306	166	168	172	176
MH2407	Nkong_Mekak	670386	305505	734	H2	332	332	173	175	306	306	166	166	134	136
MH2408	Nkong_Mekak	670364	305539	725	H2	332	332	175	181	305	312	166	176	120	156
MH2409	Nkong_Mekak	670310	305526	726	H2	332	337	177	177	305	305	166	166	128	158
MH2410	Nkong_Mekak	670318	305488	761	H2	332	332	175	177	305	306	166	180	114	128
MH2412	Nkong_Mekak	670279	305494	780	H3	334	334	175	177	306	306	170	170	150	180
MH2415	Nkong_Mekak	670259	305456	792	H3	332	334	165	173	306	308	161	168	120	170
MH2416	Nkong_Mekak	670271	305457	792	H3	332	334	173	183	310	310	166	176	114	156
MH2417	Nkong_Mekak	670252	305448	792	H3	334	334	165	175	306	310	166	176	114	185
MH2418	Nkong_Mekak	670237	305420	790	H3	334	337	173	190	306	310	161	161	124	150
MH2419	Nkong_Mekak	670226	305400	790	H3	334	334	167	173	310	318	174	178	150	152
MH2420	Nkong_Mekak	670239	305293	787	H3	332	332	161	175	305	305	161	176	118	148
MH2422	Nkong_Mekak	670251	305183	777	H3	332	332	157	157	306	306	172	176	128	160
MH2424	Nkong_Mekak	670253	305089	830	H3	334	334	157	163	305	308	172	176	150	152
MH2425	Nkong_Mekak	670259	305103	818	H3	334	334	190	190	305	305	176	180	146	156
MH2426	Nkong_Mekak	670389	304943	838	H3	334	334	165	173	308	308	159	161	120	150
MH2427	Nkong_Mekak	670386	304810	816	H3	332	332	171	175	306	306	168	184	152	156
MH2428	Nkong_Mekak	670360	304730	810	H3	334	334	157	190	308	310	159	170	128	170
MH2429	Nkong_Mekak	670369	304600	776	H3	332	334	161	175	305	305	165	166	134	143
MH2430	Nkong_Mekak	670401	304502	820	H3	332	334	161	171	305	305	166	166	128	134
MH2430b	Nkong_Mekak	671079	305630	524	H1	332	332	175	190	308	310	166	178	150	172
MH2438	Nkong_Mekak	671388	305544	603	H1	332	332	165	173	310	310	166	178	120	168
MH2439	Nkong_Mekak	671393	305546	603	H1	332	334	190	190	308	310	176	178	128	150
MH2441	Nkong_Mekak	671388	305525	603	H1	332	332	163	173	305	305	166	172	114	148
MH2443	Nkong_Mekak	671398	305517	589	H1	332	334	173	190	305	310	166	176	148	148
MH2445	Nkong_Mekak	671401	305518	589	H1	334	334	171	173	306	308	166	178	114	150
MH2446	Nkong_Mekak	671415	305511	589	H1	332	332	165	167	308	308	166	176	136	136
MH2447	Nkong_Mekak	671440	305474	615	H1	332	334	161	161	305	310	161	166	114	143
MH2448	Nkong_Mekak	671438	305482	615	H1	332	334	167	171	310	310	176	178	118	128
MH2450	Nkong_Mekak	671452	305478	624	H1	334	334	171	173	305	308	161	178	154	154
MH2452	Nkong_Mekak	671484	305459	639	H1	332	334	173	179	310	310	178	178	124	148
MH2453	Nkong_Mekak	671517	305467	651	H1	332	334	155	175	308	310	159	168	126	146
MH2457	Nkong_Mekak	671572	305373	666	H1	332	334	163	175	308	310	159	168	126	146
MH2458	Nkong_Mekak	671592	305335	669	H1	332	337	155	155	310	310	159	159	114	124
MH2461	Nkong_Mekak	671681	305276	668	H1	332	332	155	179	310	310	166	178	114	172
MH2462	Nkong_Mekak	671743	305177	693	H2	332	332	163	173	305	305	159	174	172	186
MH2463	Nkong_Mekak	671752	305183	690	H1	332	332	163	187	306	310	159	159	172	186
MH2465	Nkong_Mekak	671736	305181	693	H2	332	334	155	190	306	310	159	161	114	143
MH2466	Nkong_Mekak	671749	305144	693	H2	332	334	155	171	308	310	159	178	114	128
MH2472	Nkong_Mekak	671779	305061	709	H2	332	334	163	190	305	306	166	168	114	143
MH2473	Nkong_Mekak	671791	305064	705	H2	332	332	155	187	305	305	159	161	114	143
MH2478	Nkong_Mekak	671758	305027	742	H2	332	332	173	177	308	310	161	161	126	158
MH2482	Nkong_Mekak	671720	304904	761	H2	334	334	157	167	306	306	161	166	130	156
MH2483	Nkong_Mekak	671729	304886	755	H2	332	337	165	175	305	305	159	159	118	152
MH2485	Nkong_Mekak	671708	304814	765	H3	332	334	173	183	306	306	166	166	134	158
MH2486	Nkong_Mekak	671709	304814	765	H3	334	337	163	175	305	310	161	170	136	143
MH2487	Nkong_Mekak	671716	304814	765	H3	332	334	175	185	308	308	159	170	116	118
MH2489	Nkong_Mekak	671707	304788	777	H3	332	334	173	179	308	310	166	166	114	152
MH2492	Nkong_Mekak	671728	304758	776	H3	334	337	165	187	306	308	161	166	120	185
MH2494	Nkong_Mekak	671762	304731	788	H3	332	334	175	181	310	310	165	174	114	132
MH2495	Nkong_Mekak	671773	304718	787	H3	332	332	157	175	306	310	176	176	114	148
MH2496	Nkong_Mekak	671782	304729	788	H3	332	334	151	151	310	310	166	166	132	185

## Sheet: Sao Tome
Individuals, population, UTM coordinates and SSR genotypes						UTM zone: 32N
Individuals	Population	x	y	Altitude (m)	Altitude class	Sg03		SgC4		Sg18		Sg19		Sg10
FO0001	Sao_Tome	232976	32755.8	1181	H1	337	337	163	214	320	320	165	165	122	136
FO0004	Sao_Tome	232965	32756.8	1181	H1	337	337	163	163	310	320	165	165	128	156
FO0008	Sao_Tome	228298	31585.2	1042	H1	334	337	200	214	314	316	174	180	126	134
FO0011	Sao_Tome	228165	31419.3	1102	H1	337	337	163	214	320	320	165	165	122	136
FO0013	Sao_Tome	227296	31397.3	1465	H2	337	338	183	214	318	318	165	180	126	134
FO0014	Sao_Tome	227307	31400.7	1465	H2	337	337	183	214	316	316	168	178	126	136
FO0018	Sao_Tome	228193	32857.5	671	H1	337	337	163	165	316	318	165	165	141	156
FO0023	Sao_Tome	228120	31408.2	1171	H1	337	337	163	165	310	316	165	178	126	134
FO0024	Sao_Tome	228111	31407.3	1171	H1	334	337	181	204	310	318	174	182	136	156
FO0028	Sao_Tome	225893	31353.4	1215	H1	334	337	183	214	314	318	165	168	136	202
FO0033	Sao_Tome	228031	31364	1212	H1	337	337	163	183	316	318	165	178	136	152
FO0036	Sao_Tome	227842	31297.6	1263	H1	337	337	169	183	316	316	174	174	136	156
FO0043	Sao_Tome	227775	31253.4	1314	H1	337	337	0	0	318	320	165	180	126	126
GiD0562	Sao_Tome	231493	31042.4	1435	H2	337	340	190	214	318	328	176	180	128	134
GiD0563	Sao_Tome	231841	31302.3	1446	H2	337	337	163	185	318	322	165	180	134	134
GiD0564	Sao_Tome	231381	31482.8	1423	H2	337	338	169	193	316	318	165	165	143	166
GiD0565	Sao_Tome	231754	31219.4	1428	H2	337	344	163	185	318	320	165	176	118	122
GiD0566	Sao_Tome	231915	31002.5	1451	H2	337	337	163	207	318	318	165	174	122	122
GiD0619	Sao_Tome	232368	32019.1	1324	H1	334	334	159	207	314	318	165	172	130	194
OH1504	Sao_Tome	234267	31946.8	1151	H1	338	346	161	163	320	328	166	168	139	139
OH1505	Sao_Tome	230528	30009.3	1470	H2	338	338	161	161	316	318	174	182	128	164
OH1506	Sao_Tome	230530	30013.8	1470	H2	337	346	161	163	318	318	166	174	118	139
OH1507	Sao_Tome	230494	29956.2	1539	H3	346	349	163	163	318	318	176	176	139	148
OH1508	Sao_Tome	230485	29963	1470	H2	338	349	163	181	318	320	174	176	118	118
OH1509	Sao_Tome	230420	29944.1	1537	H3	346	346	187	204	318	328	166	180	134	139
OH1511	Sao_Tome	229884	29572.5	1441	H2	356	356	185	204	318	322	176	180	124	124
OH1512	Sao_Tome	229738	29457.5	1411	H2	346	346	185	193	318	318	165	165	130	143
OH1513	Sao_Tome	229296	29168.8	1417	H2	346	349	163	185	318	318	168	174	118	118
OH1514	Sao_Tome	228282	28938.9	1528	H3	349	349	181	185	318	318	174	176	118	139
OH1515	Sao_Tome	227759	28930.1	1637	H3	346	349	163	163	318	328	174	176	118	124
OH1516	Sao_Tome	227541	29222.2	1712	H3	337	346	163	163	318	318	174	176	122	154
OH1517	Sao_Tome	227507	29301.9	1712	H3	354	358	163	163	318	328	166	174	118	134
OH1518	Sao_Tome	227294	29441.3	1653	H3	354	354	163	204	318	318	176	176	122	143
OH1519	Sao_Tome	226858	29932.7	1896	H3	346	358	190	193	318	320	176	176	118	139
OH1520	Sao_Tome	227022	30214.7	1730	H3	346	346	163	204	318	318	166	174	118	128
OH1521	Sao_Tome	227159	30646.2	1655	H3	346	346	163	190	318	322	176	176	130	130
OH1522	Sao_Tome	227241	30818.7	1620	H3	337	337	190	214	310	318	170	178	130	154
OH1523	Sao_Tome	227381	30949.2	1580	H3	346	360	163	163	318	320	165	168	130	130
OH1524	Sao_Tome	227603	31213.6	1378	H2	334	337	185	193	316	316	165	165	122	136
OH1525	Sao_Tome	227695	31280	1314	H1	337	337	163	185	310	320	165	165	128	156
OH1526	Sao_Tome	227763	31368.5	1266	H1	337	338	159	214	310	316	168	180	126	134
OH1527	Sao_Tome	227979	31477.9	1204	H1	337	337	183	216	316	316	166	166	122	122
